# Supplementary material for: A dual-emission fluorescence-enhanced probe for imaging copper(ii) ions in lysosomes
Source: Royal Society of Chemistry journal article supplement (doi:10.1039/c5tb01184a), 2015-01-01
Supplement: c5tb01184a1.pdf [file c5tb01184a1.pdf]

*Supporting Information for*

# A Dual-Emission Fluorescence-Enhanced Probe for Imaging Copper(II) Ions in Lysosomes

*Mingguang Ren, Beibei Deng, Jian-Yong Wang, Zhan-Rong Liu, Weiying Lin\**

Institute of Fluorescent Probes for Biological Imaging, School of Chemistry and  
Chemical Engineering, School of Biological Science and Technology, University of  
Jinan, Jinan, Shandong 250022, P.R.

Email: [weiylinglin2013@163.com](mailto:weiylinglin2013@163.com)

---

\*Correspondence to: Weiying Lin, Institute of Fluorescent Probes for Biological Imaging, School of Chemistry and Chemical Engineering, School of Biological Science and Technology, University of Jinan, Jinan, Shandong 250022, P.R. China. Email: [weiylinglin2013@163.com](mailto:weiylinglin2013@163.com).

## Table of contents

|                                | Page |
|--------------------------------|------|
| Figure S1.....                 | S3   |
| Figure S2.....                 | S3   |
| Figure S3.....                 | S3   |
| Figure S4.....                 | S4   |
| Figure S5.....                 | S4   |
| Figure S6.....                 | S5   |
| Figure S7.....                 | S5   |
| Figure S8.....                 | S5   |
| Spectral characterization..... | S6-8 |

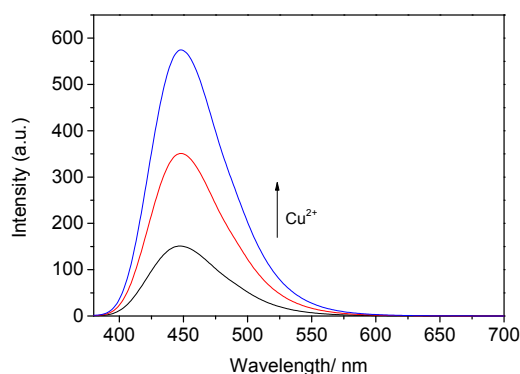

**Figure S1** The fluorescence spectral changes of control compounds **4** (10  $\mu\text{M}$ ) upon addition of increasing concentrations of  $\text{Cu}^{2+}$  (0-20 equiv) ( $\lambda_{\text{ex}} = 360 \text{ nm}$ ) in PBS buffer, pH 4.7, containing 50 %  $\text{CH}_3\text{CN}$  as a cosolvent.

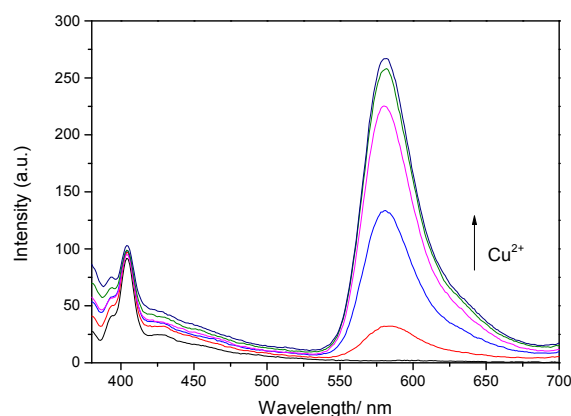

**Figure S2** The fluorescence spectral changes of control compounds **5** (10  $\mu\text{M}$ ) upon addition of increasing concentrations of  $\text{Cu}^{2+}$  (0-20 equiv) ( $\lambda_{\text{ex}} = 360 \text{ nm}$ ) in PBS buffer, pH 4.7, containing 50 %  $\text{CH}_3\text{CN}$  as a cosolvent.

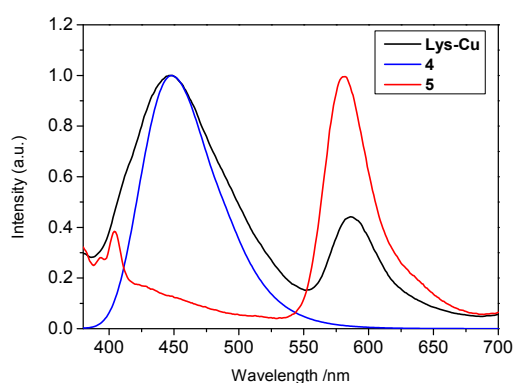

**Figure S3** The comparison of normalized fluorescence spectral of **Lys-Cu**, control compound **4** and **5** upon addition of concentrations of  $\text{Cu}^{2+}$  (20 equiv) ( $\lambda_{\text{ex}} = 360 \text{ nm}$ ) in PBS buffer, pH 4.7, containing 50 %  $\text{CH}_3\text{CN}$  as a cosolvent.

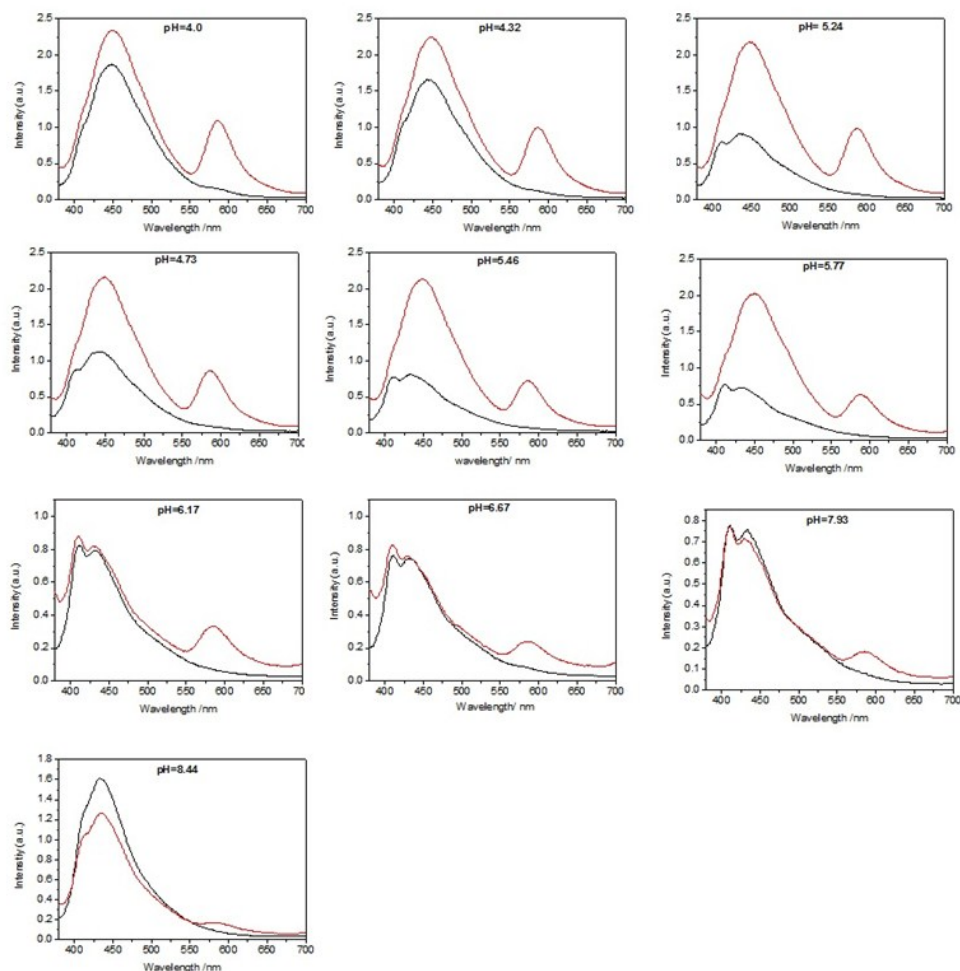

**Figure S4** The emission intensity changes of **Lys-Cu** upon addition of  $\text{Cu}^{2+}$  (20 equiv) at different pH containing 50 %  $\text{CH}_3\text{CN}$  as a cosolvent ( $\lambda_{\text{ex}} = 360 \text{ nm}$ ). (Black lines represent the fluorescence spectra before added  $\text{Cu}^{2+}$ ; red lines represent the fluorescence spectra after added  $\text{Cu}^{2+}$ ).

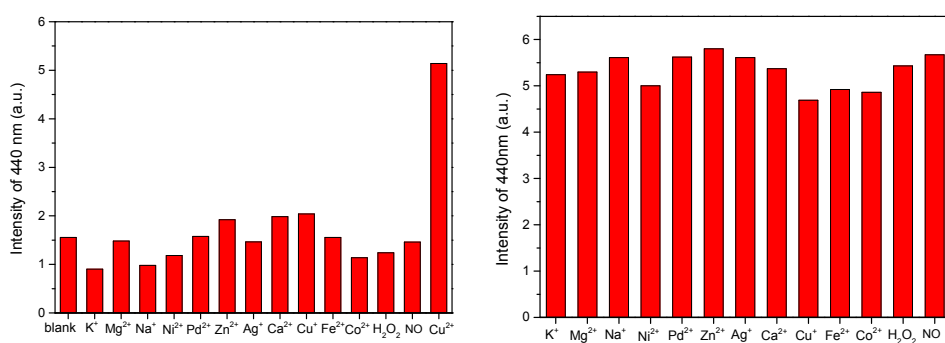

**Figure S5** (A) The fluorescence intensity of probe **Lys-Cu** (10  $\mu\text{M}$ ) at 440 nm in the presence of various analytes (30 equiv) in PBS buffer (pH 4.7, containing 50%  $\text{CH}_3\text{CN}$  as a cosolvent). (B) The fluorescence intensity of probe **Lys-Cu** (10  $\mu\text{M}$ ) at 440 nm in response to  $\text{Cu}^{2+}$  in the presence of various metal species (30 equiv) in PBS buffer (pH 4.7, containing 50%  $\text{CH}_3\text{CN}$  as a cosolvent).

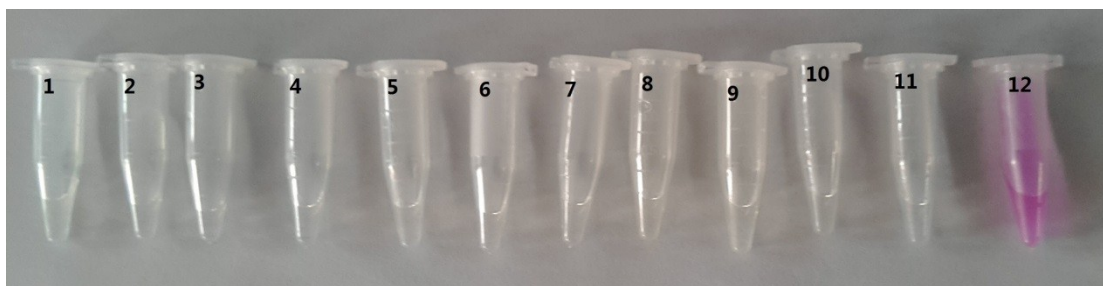

**Figure S6** Visible color changes of the probe **Lys-Cu** solution (20  $\mu\text{M}$ ) with different metal ions (20 equiv) in PBS buffer solution (pH 4.7, containing 50%  $\text{CH}_3\text{CN}$  as a co-solvent): 1.  $\text{K}^+$ ; 2.  $\text{Mg}^{2+}$ ; 3.  $\text{Na}^+$ ; 4.  $\text{Ni}^{2+}$ ; 5.  $\text{Pd}^{2+}$ ; 6.  $\text{Zn}^{2+}$ ; 7.  $\text{Ag}^+$ ; 8.  $\text{Ca}^{2+}$ ; 9.  $\text{Cu}^+$ ; 10.  $\text{Fe}^{2+}$ ; 11.  $\text{Co}^{2+}$ ; 12.  $\text{Cu}^{2+}$ .

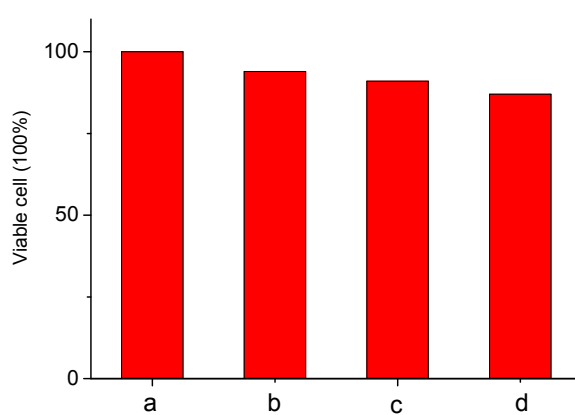

**Figure S7** Cytotoxicity assays of **Lys-Cu** at different concentrations (a: 0  $\mu\text{M}$ ; b: 1  $\mu\text{M}$ ; c: 5  $\mu\text{M}$ ; d: 10  $\mu\text{M}$ ) for NIH3T3 cells

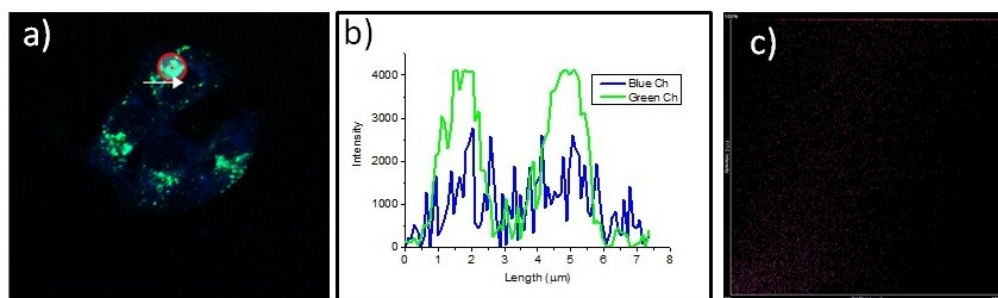

**Figure S8** Fluorescence images of SiHa cells stained with the probe **Lys-Cu**. a) overlay of blue and green channels ; b) Intensity profile of linear region of interest across the SiHa cell costained with LysoTracker Green and blue channel of **Lys-Cu**. c) Intensity scatter plot of blue and green channels.

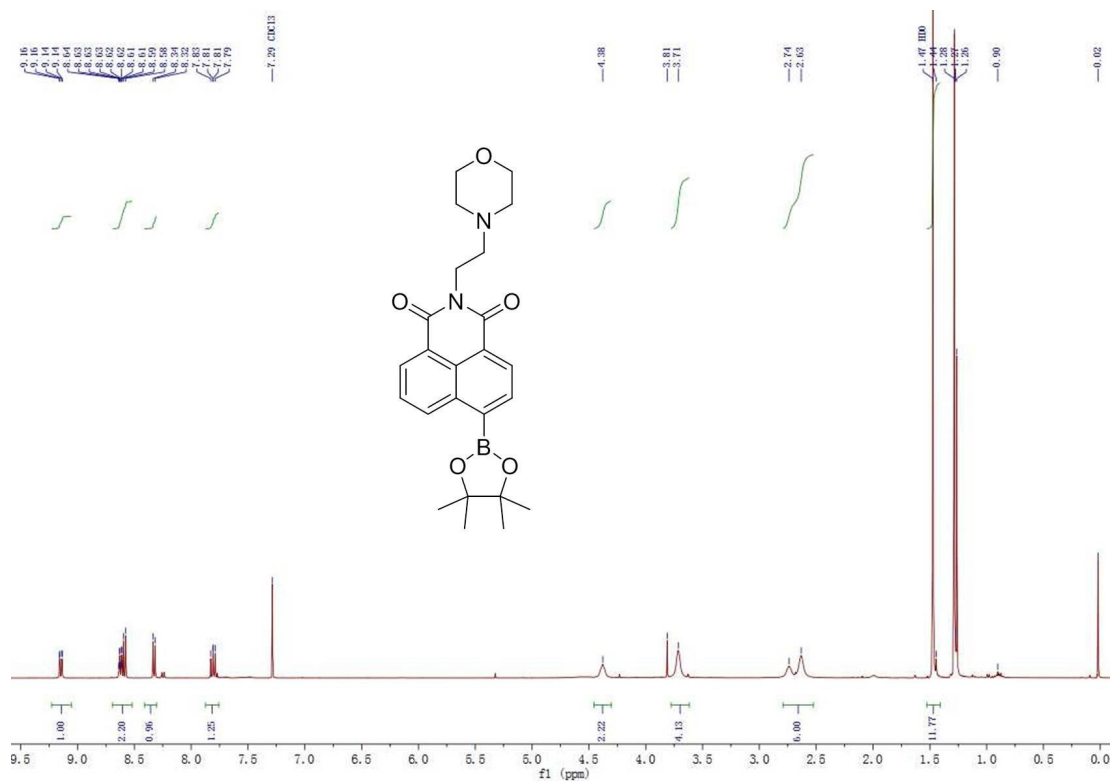

**Figure S9** <sup>1</sup>H-NMR (CDCl<sub>3</sub>) spectrum of compound 2.

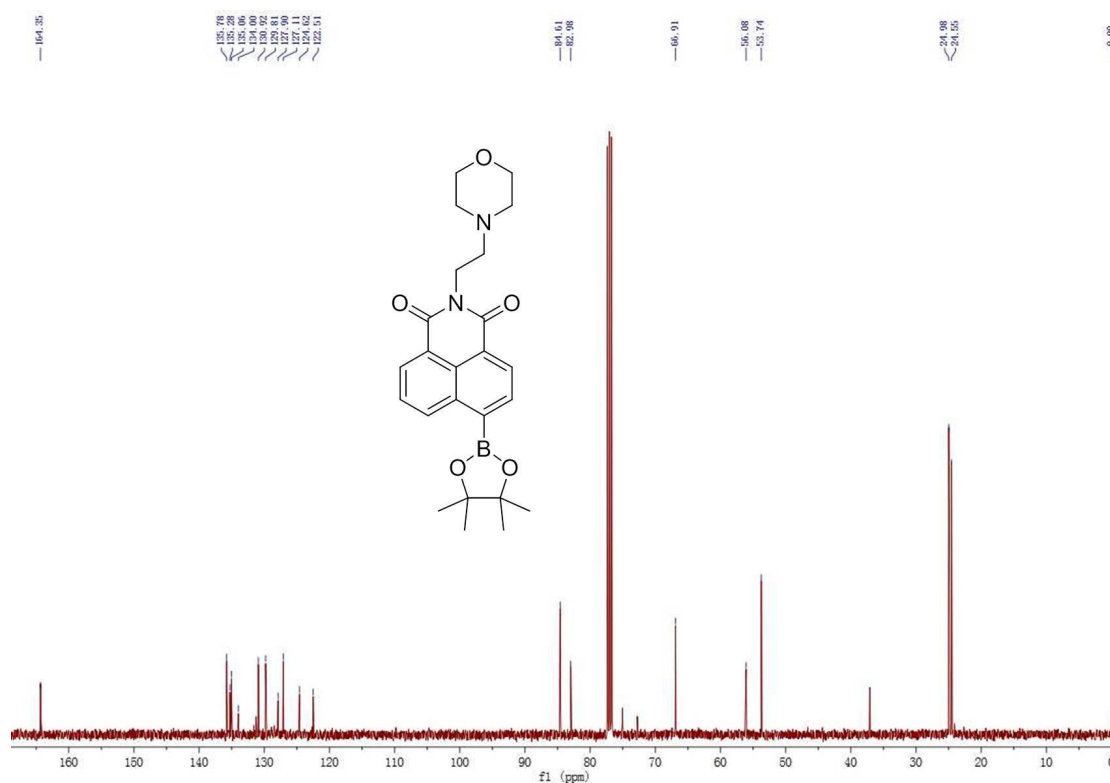

**Figure S10** <sup>13</sup>C-NMR (CDCl<sub>3</sub>) spectrum of compound 2.

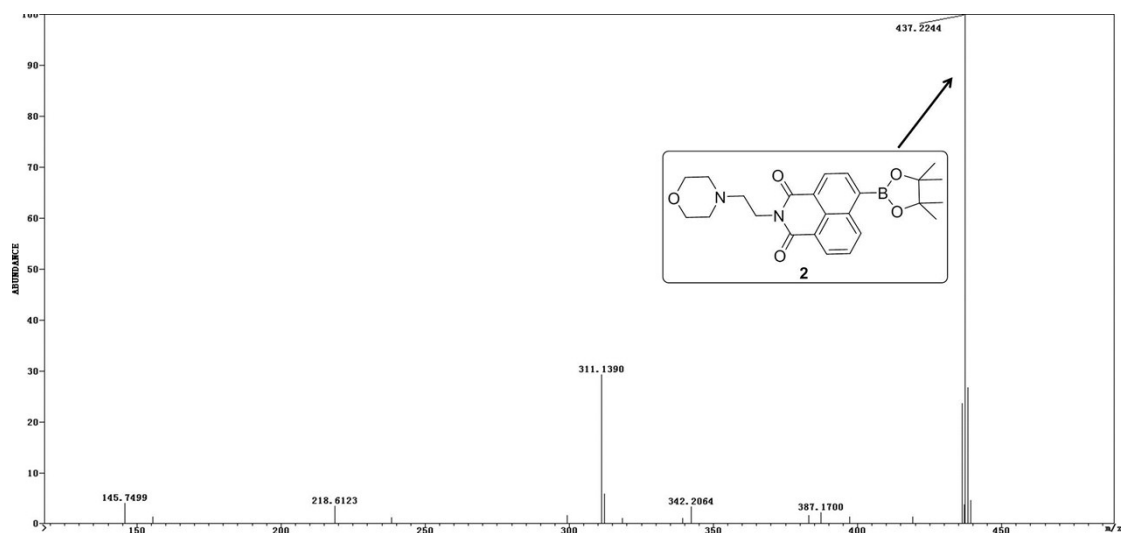

**Figure S11** HRMS (ESI) spectrum of compound **2**.

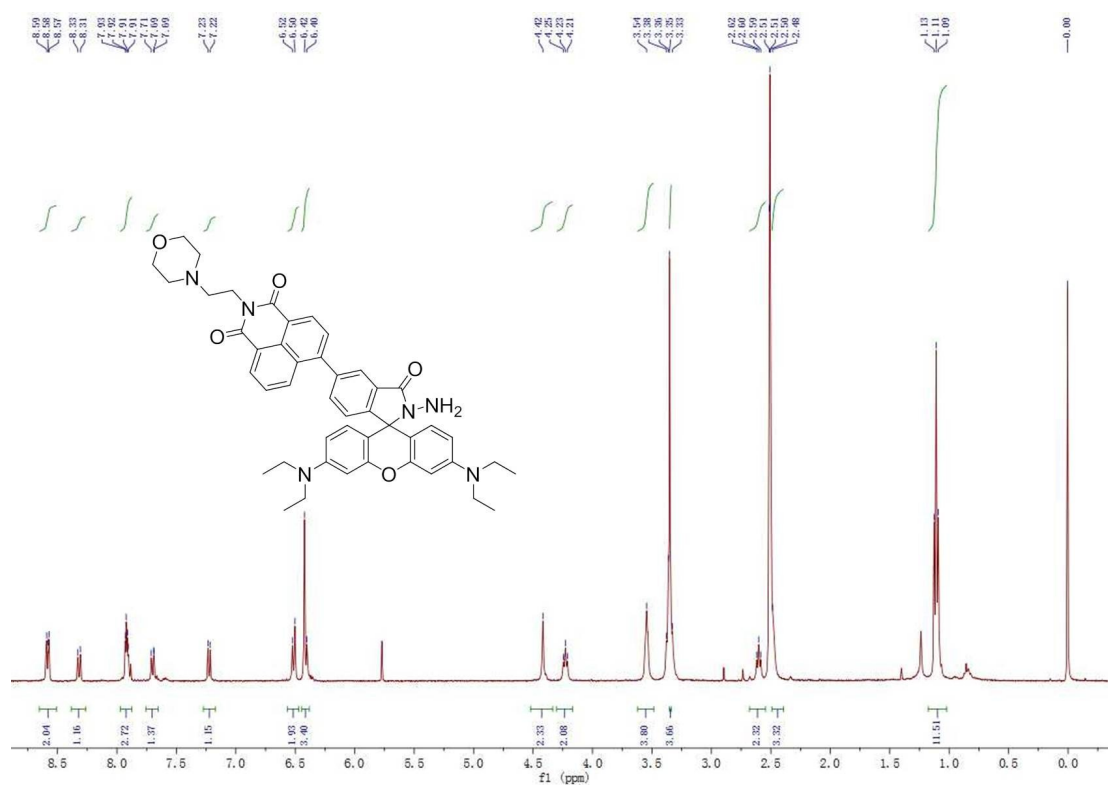

**Figure S12**  $^1\text{H}$ -NMR (DMSO- $d_6$ ) spectrum of compound **Lys-Cu**.

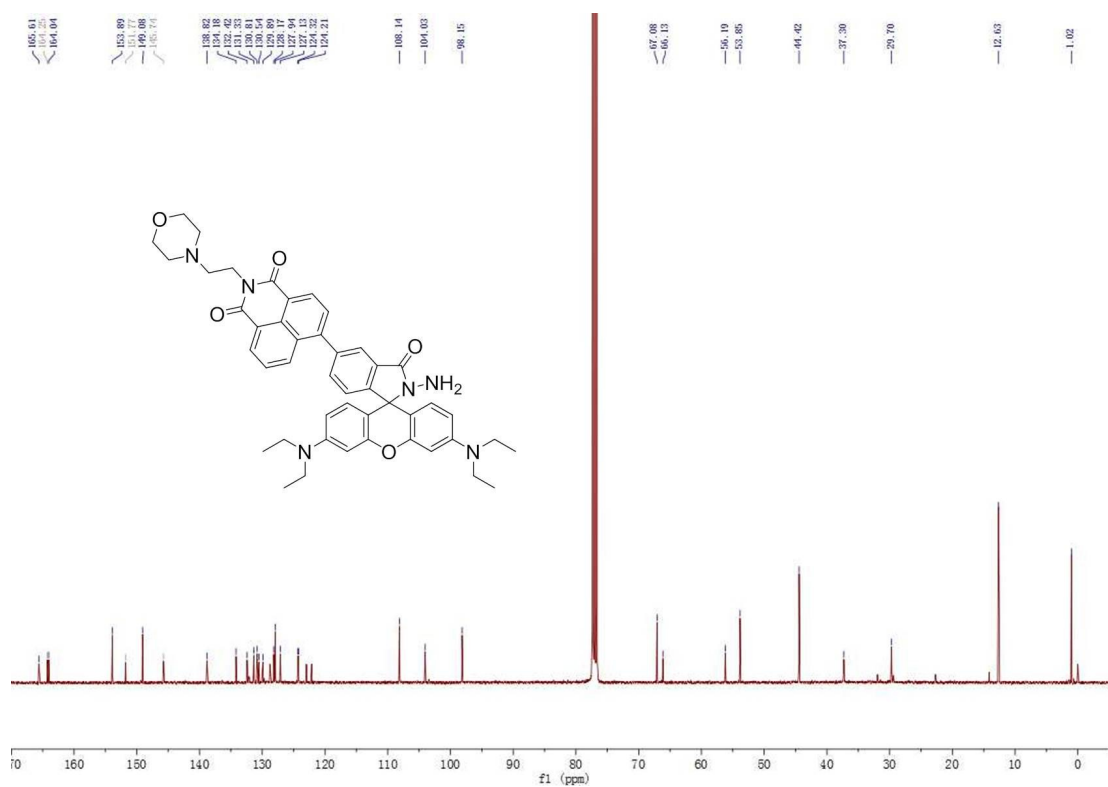

**Figure S13** <sup>13</sup>C-NMR (CDCl<sub>3</sub>) spectrum of compound **Lys-Cu**.

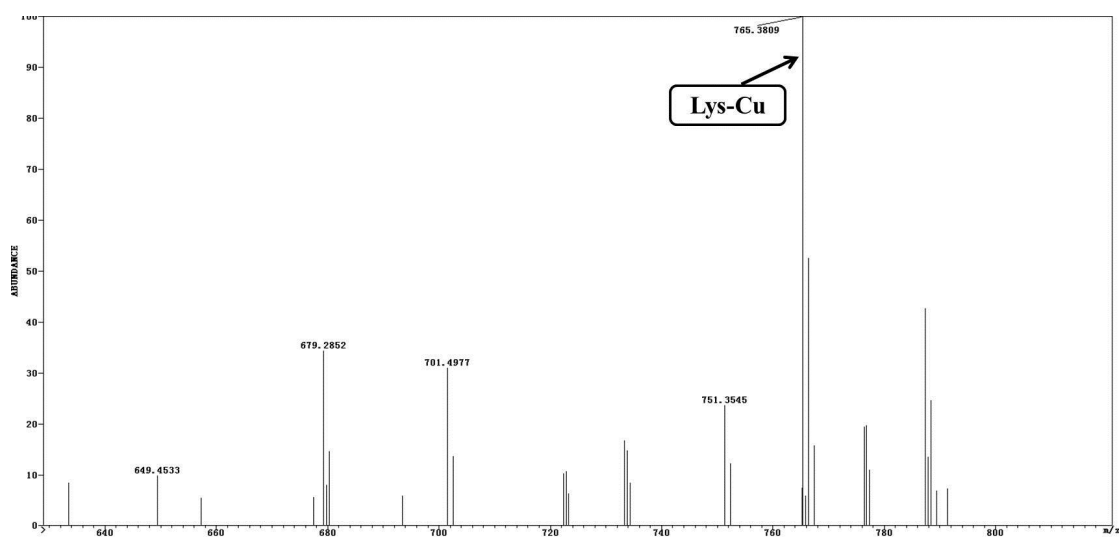

**Figure S14** HRMS (ESI) spectrum of compound **Lys-Cu**.
